# Supplementary material
Source: publisher figshare collection journal article supplement (https://f1000.figshare.com/articles/dataset/_/155790)
Supplement: Supplementary file 1 [file 1]

**Data Collection Sheet (follow-up) – to be completed in consultation with the patient**

**CONFIDENTIAL**

**1. Background Information**

Follow up Number ..... Date of follow-up ..... / ..... / .....

Name ..... Postcode .....

Date of birth ..... / ..... / ..... Current Age.....

Mode of follow-up: Face to Face

☐

Telephone

☐

*Please insert  
your practice  
stamp*

.....

**2. Assessing Symptoms**

How often do you now leak urine? (please circle below)

***Never Once a week or less 2-3 times a week once a day several times a day all the time***

How much urine do you usually leak? (please circle below)

***None a small amount a moderate amount a large amount***

Overall, how much does leaking urine now interfere with your everyday life? (please circle a number between 0 (not at all) and 10 (a great deal))

0 1 2 3 4 5 6 7 8 9 10

When does your urine now leak?

- *Never – urine does not leak.....*
- *Leaks before you can go to the toilet.....*
- *Leaks when you cough or sneeze.....*
- *Leaks when you are asleep.....*
- *Leaks when you are physically active / exercising.....*
- *Leaks when you have finished urinating and are dressed.....*
- *Leaks for no obvious reason.....*
- *Leaks all the time.....*

**3. Assessing Improvement**

- a) How often have you done your exercises (e.g. daily, twice daily etc.)?.....  
.....
- b) How did you remind yourself to do your exercises?  
.....  
.....  
.....
- c) What did you find most helpful in reminding you to exercise?  
.....  
.....
- d) Was there anything in particular that stopped you from doing your exercises?  
.....  
.....  
.....
- e) Has there been an improvement in your urine leakage following your pelvic floor exercise plan? **Y / N / Not Applicable (if no previous symptoms)**

**4. Modified Oxford Score (if measured at follow-up to be completed by the Practice Nurse)**

Please indicate the grading of the pelvic floor based on the Modified Oxford Scale by circling the appropriate number below:

**0** = no contractions **1** = flicker **2** = weak **3** = moderate (with lift) **4** = good (with lift) **5** = strong (with lift)

**5. Follow Up**

Have you recommended this patient for further follow – up? Y/ N

If not, what further action? (i.e. patient refused to participate in exercises, or patient referred to other services.

.....  
.....  
.....  
.....

**6. Date to follow-up .....**

**Mode of follow up preferred:** face to face

☐

telephone

☐

***(N.B. A face-to-face follow-up may provide an opportunity to measure any change to the MOS score).***
