# Supplementary material
Source: publisher figshare collection journal article supplement (https://f1000.figshare.com/articles/dataset/_/155790)
Supplement: Supplementary file 2 [file 1]

**Data Collection Sheet (baseline) – to be completed in consultation with the patient.**

**CONFIDENTIAL**

*Please insert  
your practice  
stamp*

**1. Background Information**

**Date** .... / .... / .....

Name.....Postcode.....

Date of birth ..... / ..... / ..... Current Age.....

Current occupation.....

How many children have you had: **0 1 2 3 4 5+** (please circle as appropriate).

Thinking back to the births, how many were:

- Normal vaginal deliveries.....
  - Vaginal deliveries with forceps.....
  - Vaginal deliveries with ventouse (suction).....
  - Caesarean section.....
- 

**2. Assessing Symptoms**

How often do you leak urine? (please circle below)

***Never Once a week or less 2-3 times a week once a day several times a day all the time***

How much urine do you usually leak? (please circle below)

***None a small amount a moderate amount a large amount***

Overall, how much does leaking urine interfere with your everyday life? (please circle a number between 0 (not at all) and 10 (a great deal))

0    1    2    3    4    5    6    7    8    9    10

When does your urine leak?

- *Never – urine does not leak.....*
  - *Leaks before you can go to the toilet.....*
  - *Leaks when you cough or sneeze.....*
  - *Leaks when you are asleep.....*
  - *Leaks when you are physically active / exercising.....*
  - *Leaks when you have finished urinating and are dressed.....*
  - *Leaks for no obvious reason.....*
  - *Leaks all the time.....*
- .....

**3.Modified Oxford Score (to be completed by the practice nurse).**

Please indicate the grading of the pelvic floor based on the Modified Oxford Scale by circling the appropriate number below:

**0** = no contractions **1** = flicker **2** = weak **3** = moderate (with lift) **4** = good (with lift) **5** = strong (with lift)

**4.Pelvic Floor Muscle Training Plan (only for those eligible)**

Here the practice nurse should briefly describe the care plan advised to the patient and how often the exercises should be carried out in line with the PERFECT scheme:

Exercise recommended

Intensity.....

Number of Repetitions.....

Number of Fast Contractions.....

**5.Follow Up**

Have you recommended this patient for follow – up? Y/ N

If not, what further action? (i.e. patient refused to participate in exercises, or patient referred to other services.

.....  
.....  
.....  
.....

**6.Date to follow-up** (at least 3 months after the start of the exercise programme).....

Mode of follow up preferred: face to face ☐ or telephone ☐

***(N.B: A face-to-face follow-up may provide an opportunity to measure any change to the MOS score).***
